# Supplementary material for: Case-Control Study of Arsenic in Drinking Water and Lung Cancer in California and Nevada
Source: Int J Environ Res Public Health. 2013 Aug 2;10(8):3310–24. doi: 10.3390/ijerph10083310 (PMC3774440; doi:10.3390/ijerph10083310)
Supplement: Supplementary File 1 — Supplementary (PDF, 50 KB) [file ijerph-10-03310-s001.pdf]

## Case-Control Study of Arsenic in Drinking Water and Lung Cancer in California and Nevada

**Table 1.** Smoking and drinking water characteristics for 30 subjects with  $\geq 85$  ug/L arsenic in drinking water at least 40 years before enrollment, western Nevada and central California, 2002–2005.

| Lung cancer | Smoked | Packs/ week* | CA | Public water $\geq$ 85 $\mu\text{g/L}$ | Arsenic in drinking water               |                    |                          |                                              |                                            |                                         |
|-------------|--------|--------------|----|----------------------------------------|-----------------------------------------|--------------------|--------------------------|----------------------------------------------|--------------------------------------------|-----------------------------------------|
|             |        |              |    |                                        | Highest 5-year mean ( $\mu\text{g/L}$ ) |                    |                          | Cumulative                                   |                                            |                                         |
|             |        |              |    |                                        | $\geq 40$ years before                  | $> 5$ years before | $< 40^{**}$ years before | ( $\mu\text{g/L}$ -years) $> 5$ years before | Years since $\geq$ 85 $\mu\text{g/L}^{**}$ | Years since $>$ 10 $\mu\text{g/L}^{**}$ |
| 1           | 1      | 21           | 1  | 1                                      | 110                                     | 110                | 106                      | 1,752                                        | 29                                         | 0                                       |
| 1           | 1      | 21           | 1  | 1                                      | 110                                     | 110                | 106                      | 1,592                                        | 29                                         | 0                                       |
| 1           | 1      | 20           | 1  | 1                                      | 110                                     | 110                | 83                       | 1,337                                        | 27                                         | 0                                       |
| 1           | 1      | 18           | 1  | 1                                      | 110                                     | 110                | 110                      | 1,572                                        | 27                                         | 0                                       |
| 1           | 1      | 14           | 1  | 1                                      | 110                                     | 110                | 106                      | 1,449                                        | 29                                         | 0                                       |
| 1           | 1      | 11           | 1  | 1                                      | 99                                      | 110                | 110                      | 563                                          | 34                                         | 9                                       |
| 1           | 1      | 7            | 1  | 1                                      | 110                                     | 110                | 3                        | 896                                          | 44                                         | 42                                      |
| 1           | 1      | 7            | 1  | 1                                      | 110                                     | 110                | 88                       | 1,287                                        | 35                                         | 14                                      |
| 1           | 1      | 7            | 1  | 1                                      | 110                                     | 110                | 110                      | 1,947                                        | 28                                         | 2                                       |
| 1           | 1      | 4            | 1  | 1                                      | 110                                     | 110                | 8                        | 1,027                                        | 58                                         | 58                                      |
| 1           | 1      | 2            | 1  | 1                                      | 110                                     | 110                | 110                      | 988                                          | 29                                         | 0                                       |
| 1           | 1      | 7            | 0  | 0                                      | 1,460                                   | 1,460              | 1,460                    | 27,314                                       | 0                                          | 0                                       |
| 0           | 1      | 14           | 1  | 1                                      | 110                                     | 110                | 3                        | 470                                          | 53                                         | 52                                      |
| 0           | 1      | 11           | 1  | 1                                      | 110                                     | 110                | 102                      | 1,135                                        | 30                                         | 0                                       |
| 0           | 1      | 7            | 1  | 1                                      | 110                                     | 110                | 102                      | 1,734                                        | 30                                         | 0                                       |
| 0           | 1      | 4            | 1  | 1                                      | 110                                     | 110                | 102                      | 1,284                                        | 34                                         | 0                                       |
| 0           | 1      | 3            | 1  | 1                                      | 110                                     | 110                | 110                      | 1,596                                        | 28                                         | 0                                       |
| 0           | 1      | 14           | 0  | 1                                      | 90                                      | 90                 | 4                        | 349                                          | 65                                         | 65                                      |
| 0           | 1      | 7            | 0  | 0                                      | 150                                     | 200                | 20                       | 490                                          | 40                                         | 0                                       |
| 0           | 0      | 0            | 1  | 1                                      | 88                                      | 110                | 102                      | 971                                          | 30                                         | 0                                       |
| 0           | 0      | 0            | 1  | 1                                      | 110                                     | 110                | 102                      | 1,518                                        | 30                                         | 10                                      |

Table 1. Cont.

| Lung cancer                | Smoked | Packs/ week* | CA   | Public water $\geq$ 85 $\mu\text{g/L}$ | Arsenic in drinking water               |                    |                          |                                              |                                            |                                         |
|----------------------------|--------|--------------|------|----------------------------------------|-----------------------------------------|--------------------|--------------------------|----------------------------------------------|--------------------------------------------|-----------------------------------------|
|                            |        |              |      |                                        | Highest 5-year mean ( $\mu\text{g/L}$ ) |                    |                          | Cumulative                                   |                                            |                                         |
|                            |        |              |      |                                        | $\geq 40$ years before                  | $> 5$ years before | $< 40^{**}$ years before | ( $\mu\text{g/L}$ -years) $> 5$ years before | Years since $\geq$ 85 $\mu\text{g/L}^{**}$ | Years since $>$ 10 $\mu\text{g/L}^{**}$ |
| 0                          | 0      | 0            | 1    | 1                                      | 110                                     | 110                | 30                       | 332                                          | 54                                         | 0                                       |
| 0                          | 0      | 0            | 1    | 1                                      | 110                                     | 110                | 39                       | 875                                          | 78                                         | 0                                       |
| 0                          | 0      | 0            | 1    | 1                                      | 110                                     | 110                | 36                       | 460                                          | 41                                         | 0                                       |
| 0                          | 0      | 0            | 1    | 1                                      | 110                                     | 110                | 3                        | 482                                          | 42                                         | 42                                      |
| 0                          | 0      | 0            | 1    | 1                                      | 110                                     | 110                | 66                       | 1,206                                        | 37                                         | 14                                      |
| 0                          | 0      | 0            | 1    | 1                                      | 110                                     | 110                | 110                      | 1,229                                        | 27                                         | 10                                      |
| 0                          | 0      | 0            | 0    | 1                                      | 90                                      | 90                 | 4                        | 508                                          | 54                                         | 54                                      |
| 0                          | 0      | 0            | 0    | 1                                      | 90                                      | 96                 | 96                       | 748                                          | 10                                         | 0                                       |
| 0                          | 0      | 0            | 0    | 0                                      | 690                                     | 690                | 25                       | 3,719                                        | 64                                         | 0                                       |
| <i>Percent or Average</i>  |        |              |      |                                        |                                         |                    |                          |                                              |                                            |                                         |
| Cases                      | 100%   | 11.5         | 92%  | 92%                                    | 222                                     | 223                | 200                      | 3,477                                        | 31                                         | 10                                      |
| Controls                   | 39%    | 3.3          | 72%  | 89%                                    | 140                                     | 144                | 59                       | 1,061                                        | 42                                         | 14                                      |
| <i>p</i> -Value (2-tailed) | 0.0001 | 0.002        | 0.17 | 0.81                                   | 0.50                                    | 0.52               | 0.25                     | 0.29                                         | 0.06                                       | 0.67                                    |

CA California, 1 yes, 0 no. \*Average packs of 20 cigarettes (or equivalent for cigars and pipes) usually smoked during period of regular smoking, if ever smoked  $> 6$  months. \*\* Exposures lasting  $< 5$  years before enrollment were not counted.
